# Supplementary material
Source: Springer Nature journal article supplement (https://www.springermedizin.de/resource/supplementary/12885_2012_3375_MOESM1_ESM.pdf/9463152)
Supplement: MOESM1 [file 9463152]

Screening  
Completion of staging  
Evaluation of Resectability

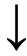

Informed Consent  
Registration

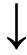

Immobilisation  
Treatment Planning

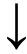

Neoadjuvant IMRT 25-28 Fx  
(start within 6 weeks from registration)

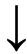

Reevaluation (CT/MRT)  
(2-4 weeks from the end of neoadjuvant IMRT)

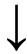

Surgery + IORT (10-12 Gy)  
(within 6 weeks from the end of neoadjuvant IMRT)

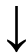

Follow up
